# Supplementary material for: Design of nanostructured hybrid materials: twin polymerization of urethane-based twin prepolymers
Source: Royal Society of Chemistry journal article supplement (doi:10.1039/c8ra05310c), 2018-01-01
Supplement: c8ra05310c1.pdf [file c8ra05310c1.pdf]

## Design of nanostructured hybrid materials: twin polymerization of urethane-based twin prepolymer

D. Uhlig<sup>a</sup>, S. Spange<sup>a</sup>, A. Seifert<sup>a</sup>, K. Nagel<sup>a</sup>, S. Anders<sup>b</sup>, L. Kroll<sup>b</sup>, R. Stoll<sup>c</sup>, F. Thielbeer<sup>d</sup>, P. Müller<sup>d</sup> and K. Schreiter<sup>\*a</sup>

### Supporting information

#### Preparation of polyurethane twin-prepolymer **4a**:

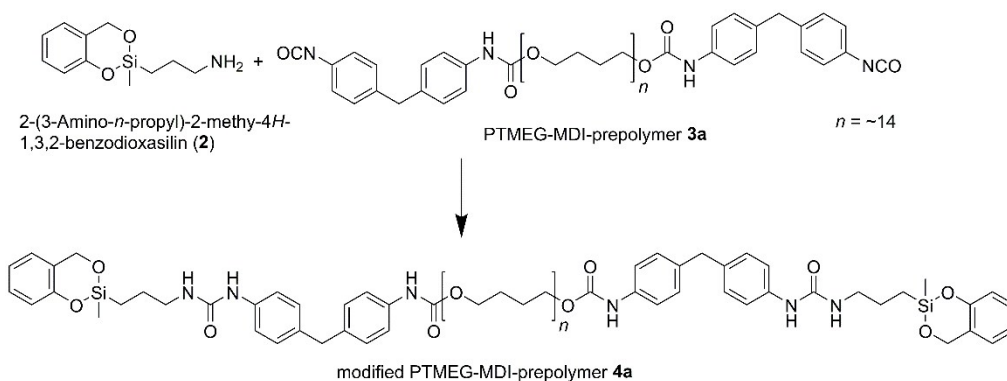

**Scheme S1:** General reaction scheme for the preparation of twin prepolymer **4a** by end-capping of the isocyanate containing prepolymer **3a**. The reaction can be performed in solution or in situ directly after the preparation of **3a**.

In a three-necked flask with dropping funnel, internal thermometer and mechanical stirrer, 10.02 g (40.0 mmol) diphenylmethan-4,4'-diisocyanate (MDI) are placed and tempered at 50 °C. 18.0 g (18.0 mmol) polytetramethylene ether glycol (PTMEG; average molecular weight 1000 g/mol) were added to the molten MDI within 15 minutes. The reaction mixture was heated to 98 °C for 2 h. The dropping funnel was replaced by a septum. 9.88 g 2-(3-Amino-*n*-propyl)-2-methyl-4*H*-1,3,2-benzodioxasilin (**2**) were slowly added through the septum to the prepolymer at 70 °C. The temperature was kept under 100 °C during the addition. Under minimized stirring rate the reaction mixture was stirred for 30 minutes at 70 °C.

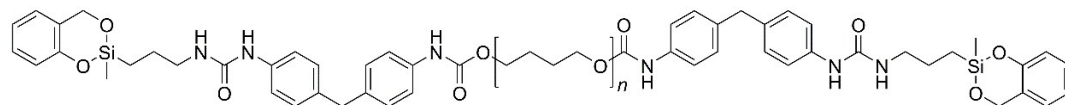

<sup>1</sup>H NMR (CDCl<sub>3</sub>): δ [ppm] = 0.23 (s, 6H, Si-CH<sub>3</sub>), 0.70 (m, 4H, Si-CH<sub>2</sub>-), 1.46–1.73 (m (broad), O-CH<sub>2</sub>-CH<sub>2</sub>-CH<sub>2</sub>-CH<sub>2</sub>-O- (polymer); Si-CH<sub>2</sub>-CH<sub>2</sub>-), 3.10 (m, 4H, CH<sub>2</sub>-NHCONH), 3.39 (s (broad), O-CH<sub>2</sub>-CH<sub>2</sub>-CH<sub>2</sub>-CH<sub>2</sub>-O- (polymer)), 3.85 (s, 4H, Ph-CH<sub>2</sub>-Ph), 4.14 (m, 4H, NHCO-O-CH<sub>2</sub>-), 4.87 (m, 4H, CH<sub>2</sub>-O-Si-), 6.80 (m, Ar-H). <sup>13</sup>C {<sup>1</sup>H} NMR (CDCl<sub>3</sub>): δ [ppm] = -2.7 (Si-CH<sub>3</sub>), 12.6 (CH<sub>2</sub>-Si), 23.2 (CH<sub>2</sub>-CH<sub>2</sub>-Si), 26.0/26.3/26.6 (-O-CH<sub>2</sub>-CH<sub>2</sub>-CH<sub>2</sub>-CH<sub>2</sub>-O- (polymer)), 40.0 (Ph-CH<sub>2</sub>-Ph), 42.2 (-NHCONH-CH<sub>2</sub>-), 63.8 (CH<sub>2</sub>-O-Si), 64.9 (NHCO-O-CH<sub>2</sub>-), 70.5 (-O-CH<sub>2</sub>-CH<sub>2</sub>-CH<sub>2</sub>-CH<sub>2</sub>-O- (polymer)), 119.3 (Ar-C), 120.0 (Ar-C), 121.2 (Ar-C), 126.3 (Ar-C), 127.0 (Ar-C), 127.9 (Ar-C), 129.1 (Ar-C), 129.5 (Ar-C), 129.7 (Ar-C), 136.2 (Ar-C), 153.1 (CH-C-O-Si), 154.0 (NHCO-O-), 156.4 (-NHCONH-). <sup>29</sup>Si NMR (CDCl<sub>3</sub>): δ [ppm] = 3.05 (D<sub>0</sub>).

#### Preparation of polyurethane twin prepolymer **4b**:

The procedure described above was applied for the preparation and modification of **3b**. Following quantities were used:

- 10.46 g MDI (41.8 mmol)
- 19.0 g polypropylene ether glycol (PPG; average molecular weight 1000 g/mol)
- 9.65 g **2**

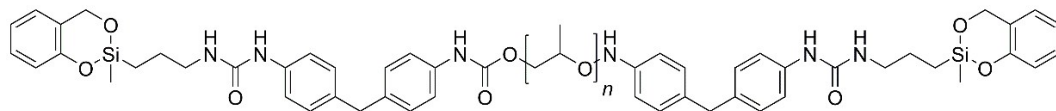

**<sup>1</sup>H NMR (CDCl<sub>3</sub>):** δ [ppm] = 0.24 (s, 6H, Si-CH<sub>3</sub>), 0.71 (m, 4H, Si-CH<sub>2</sub>-), 1.11 (s, O-CH<sub>2</sub>-CH(CH<sub>3</sub>)-O-, polyol), 1.55 (m, 4H, Si-CH<sub>2</sub>-CH<sub>2</sub>-), 3.11 (m, 4H, CH<sub>2</sub>-NHCONH-), 3.38–3.53 (O-CH<sub>2</sub>-CH(CH<sub>3</sub>)-O-, polyol), 4.85 (m, 4H, CH<sub>2</sub>-O-Si-), 6.83–7.38 (Ar-H). **<sup>13</sup>C {<sup>1</sup>H} NMR (CDCl<sub>3</sub>):** δ [ppm] = -3.0 (Si-CH<sub>3</sub>), 12.42 (CH<sub>2</sub>-Si), 17.2 (-CH-CH<sub>3</sub>), 23.1 (CH<sub>2</sub>-CH<sub>2</sub>-Si), 40.5 (Ph-CH<sub>2</sub>-Ph), 42.1 (-NHCONH-CH<sub>2</sub>-), 63.8 (CH<sub>2</sub>-O-Si), 64.0 (NHCO-O-CH<sub>2</sub>-), 71.7–75.5 (-O-CH(CH<sub>3</sub>)-CH<sub>2</sub>-O-), 119.1 (Ar-C), 119.9 (Ar-C), 120.9 (Ar-C), 126.1 (Ar-C), 126.9 (Ar-C), 128.8 (Ar-C), 129.2, 135.4, 136.1, 137.2, 153.0/153.4 (NHCO-O-), 156.4/156.5 (-NHCONH-). **<sup>29</sup>Si NMR (CDCl<sub>3</sub>):** δ [ppm] = 2.97 (D<sub>0</sub>).

#### Preparation of polyurethane twin-prepolymer **4c**:

In a three-necked flask with dropping funnel, internal thermometer and mechanical stirrer, 4.94 g (22.23 mmol) isophoronediiisocyanate (IPDI) are placed and tempered at 50 °C. 10.71 g (10.71 mmol) PTMEG were added to the diisocyanate within 5 minutes. After complete addition of the polyol, 0.01 mL dibutyltin dilaurate (Merck) was added to the reaction mixture and a slight temperature increase was observed (65 °C). After the reaction mixture cooled down to 50 °C, the reaction mixture was heated to 98 °C for 2 h. The dropping funnel was replaced by a septum. 5.14 g (23.05 mmol) **2** were slowly added with a syringe through the septum to the prepolymer at 70 °C. The temperature was kept under 100 °C during the addition. Under minimized stirring rate the reaction mixture was stirred for 30 minutes at 70 °C.

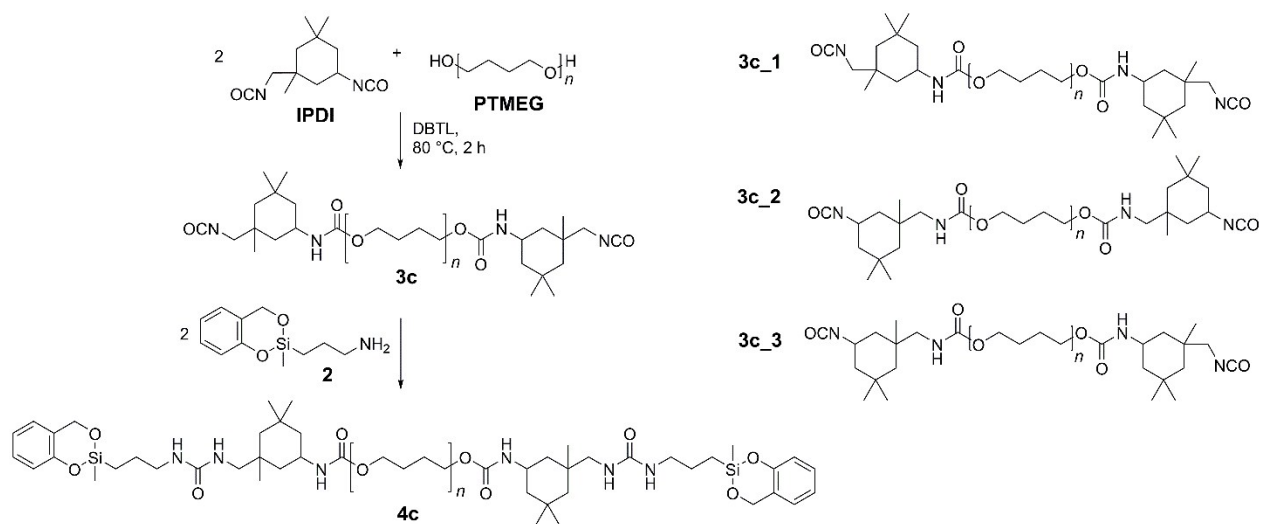

**Scheme S2:** Simplified reaction scheme for the preparation of the prepolymer **4c**. The prepolymer **3c**, and thus the prepolymer **4c** principally consists of different possible constitutional isomers (illustrated in structures **3c<sub>1</sub> – 3c<sub>3</sub>**). The different *cis*- and *trans*-isomers of the cyclohexyl-increments are not considered in this scheme.

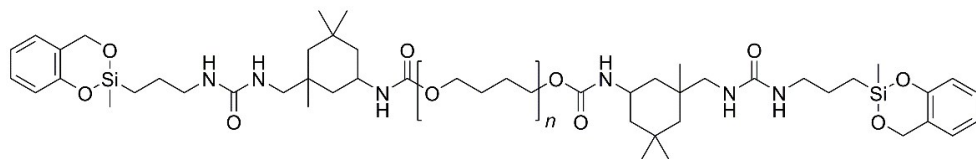

**$^1\text{H}$  NMR ( $\text{CDCl}_3$ ):**  $\delta$  [ppm] = 0.23 (s, 6H, Si- $\text{CH}_3$ ), 0.70 (m, 4H, Si- $\text{CH}_2$ -), 0.84 ( $\text{CH}_3$  IPDI), 0.95/0.97 ( $\text{CH}_3$  IPDI), 1.56 (m (broad), O- $\text{CH}_2$ - $\text{CH}_2$ - $\text{CH}_2$ -O- (polymer); Si- $\text{CH}_2$ - $\text{CH}_2$ -), 2.82 (2H, - $\text{CHNH}$ -), 3.07 (m, 4H,  $\text{CH}_2$ -NHCONH), 3.35 (s (broad), O- $\text{CH}_2$ - $\text{CH}_2$ - $\text{CH}_2$ - $\text{CH}_2$ -O- (polymer)), 3.97 (m, 4H, NHCO-O- $\text{CH}_2$ -), 4.84 (m, 4H,  $\text{CH}_2$ -O-Si-), 6.82 (m, Ar-H), 7.08 (m, Ar-H).  **$^{13}\text{C}$  { $^1\text{H}$ } NMR ( $\text{CDCl}_3$ ):**  $\delta$  [ppm] = -3.2 (Si- $\text{CH}_3$ ), 12.0 ( $\text{CH}_2$ -Si), 23.2 ( $\text{CH}_2$ - $\text{CH}_2$ -Si), 26.1 (-O- $\text{CH}_2$ - $\text{CH}_2$ - $\text{CH}_2$ - $\text{CH}_2$ -O- (polymer)), 42.1 (-NHCONH- $\text{CH}_2$ -), 53.6, 63.4 ( $\text{CH}_2$ -O-Si), 64.0 (NHCO-O- $\text{CH}_2$ -), 70.1 (-O- $\text{CH}_2$ - $\text{CH}_2$ - $\text{CH}_2$ - $\text{CH}_2$ -O- (polymer)), 119.0 (Ar-C), 118.3 (Ar-C), 120.8 (Ar-C), 125.9 (Ar-C), 126.7 (Ar-C), 128.7 (Ar-C), 152.9/156.0 (NHCO-O-), 158.9 (-NHCONH-).  **$^{29}\text{Si}$  NMR ( $\text{CDCl}_3$ ):**  $\delta$  [ppm] = 2.89 ( $\text{D}_0$ ).

ATR-FTIR-spectra:

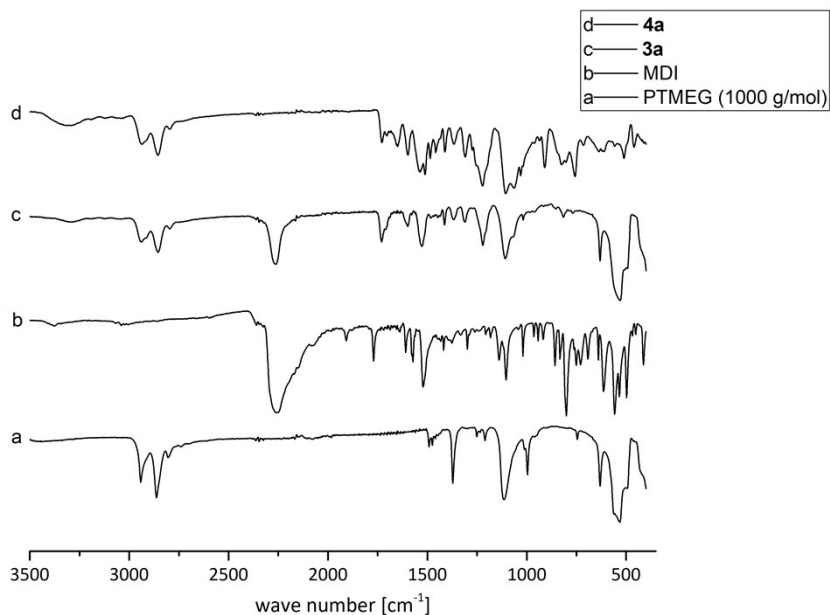

**Figure S1:** ATR-FTIR-spectra of the components for the prepolymer preparation (**a**: PTMEG; **b**: MDI), the resulting prepolymer (**3a**) and the product **4a**. The characteristic signal of the asymmetric NCO-stretching vibration at around 2300 cm<sup>-1</sup> vanishes due to the complete reaction with **2** between spectrum **c** and **d**.

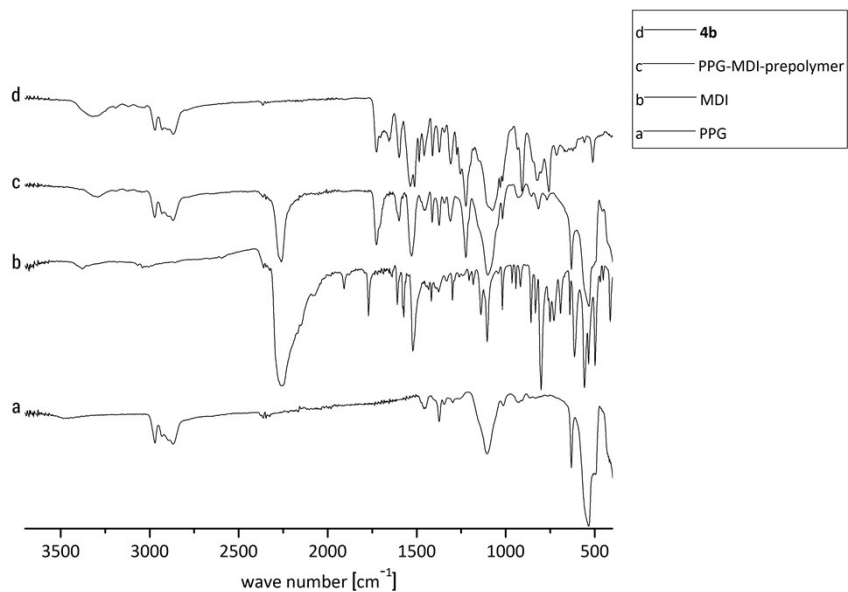

**Figure S2:** ATR-FTIR-spectra of the corresponding educts, as well as a sample of the reaction mixture (PPG-MDI-prepolymer **3b**) and the resulting twin prepolymer **4b**.

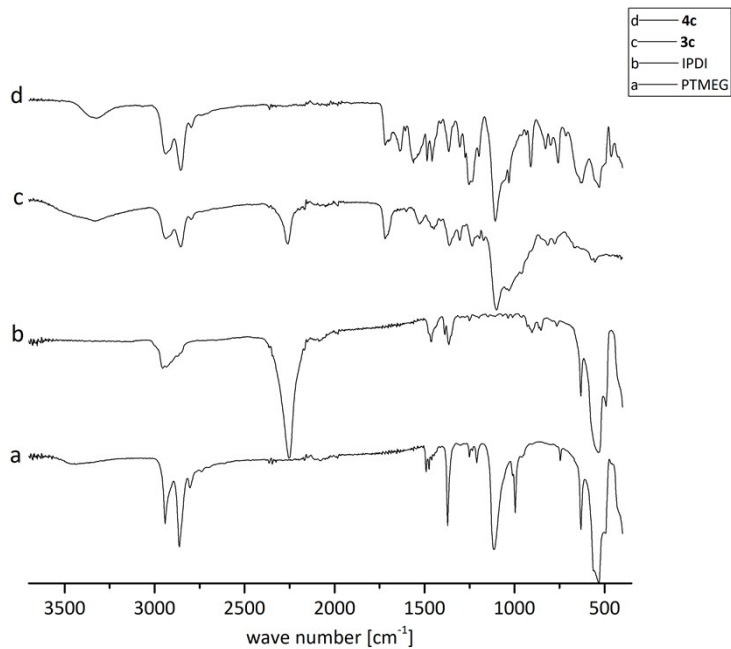

**Figure S3:** ATR-FTIR-spectra of the corresponding educts, as well as a sample of the reaction mixture (IPDI-PTMEG-prepolymer **3c**) and the resulting twin prepolymer **4c**.

**SEC-measurements of **4a** and **4b**:**

**Prepolymer **4a**:**

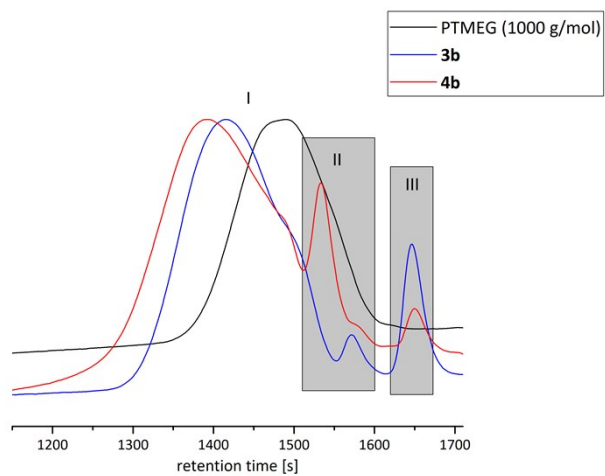

**Figure S4:** SEC-traces of the different stages of the in situ-preparation of twin prepolymer **4a**. The increase of the mass can be detected. Low molecular by-products are present due to the required excess of diisocyanate for the formation of the prepolymer.

**Table S1:** SEC-values of the different samples at the in situ preparation of **4a**.

| Sample             | Signal | M <sub>n</sub> | PDI  |
|--------------------|--------|----------------|------|
| PTMEG (1000 g/mol) | I      | 1550           | 1.6  |
| <b>3a</b>          | I      | 3370           | 1.7  |
|                    | II     | 530            | 1.03 |
|                    | III    | 184            | 1.03 |
| <b>4a</b>          | I      | 4710           | 1.9  |
|                    | II     | 860            | 1.06 |
|                    | III    | 180            | 1.02 |

Signal III is assigned as MDI (MW 250.26 g/mol). Signal II can be interpreted as MDI-dimer which formed through hydrolysis of MDI and subsequent reaction with MDI. Signal I can be interpreted as adduct of **2** and MDI (2n **2** and n MDI 695.28 g/mol). Signal III can be assigned as unreacted MDI or **2**. The SEC-trace does not give information about the quantitative amount of those by-products. As no free isocyanate can be detected by ATR-FTIR-measurement, the amount of unreacted MDI is comparatively low (less than 1%).

### Prepolymer **4b**:

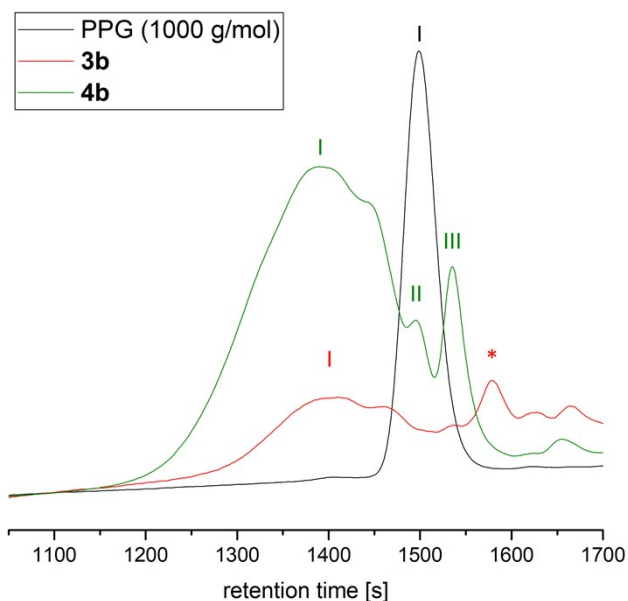**Figure S5:** SEC-traces of PPG, PPG-MDI-prepolymer **3b** and **4b**.**Table S2:** Determined SEC-values of PPG, PPG-MDI-prepolymer **3b** and **4b**.

| Sample           | Signal | M <sub>n</sub>                | PDI  |
|------------------|--------|-------------------------------|------|
| PPG (1000 g/mol) | I      | 1480                          | 1.06 |
| <b>3b</b>        | I      | 5310                          | 1.52 |
|                  | *      | Outside the calibration range |      |
| <b>4b</b>        | I      | 5160                          | 2.26 |
|                  | II     | 1590                          | 1.01 |
|                  | III    | 880                           | 1.04 |

## Polymerizations:

### STP of 4a with 1:

Thermal induced STP of modified prepolymer **4a** with 2,2'-spirobi[4H-1,3,2-benzodioxasilin] (**1**):

Example with a molar ratio of **4a** : **1** of **85** : **15**. The reaction temperature was determined by DSC-measurement, whereas attempts with different reaction temperatures were also made.

In a 10 mL PTFE-wide-neck-flask with screw-cap and magnetic stirrer 1.14 g (0.58 mmol) of **4a** and 0.028 g (0.10 mmol) **1** are placed under argon. Under stirring, the flask was heated to 125 °C for 0.5 h. The magnetic stirrer was removed out of the slightly yellow reaction mixture. The reaction-flask was heated to 170 °C for 2 h. The obtained material were cut into small pieces with a scalpel for purification by extraction with dichloromethane for 48 h. The extracted material was dried in a vacuum oven at 40 °C to a constant mass.

**Table S3:** Parameters for the polymerization of mixtures consisting of equimolar amounts **1** and **4a** at different reaction temperatures. Every sample was polymerized for 2 h. The calculated amount of silica for the equimolar mixture is 8.1 wt%.

| Sample   | T [°C] | t [h] | extr. content [wt%] | silica content [wt%] (TGA) |                                                                                       |
|----------|--------|-------|---------------------|----------------------------|---------------------------------------------------------------------------------------|
| HM5a_170 | 170    | 2     | 47                  | 11                         |   |
| HM5a_190 | 190    | 2     | 47                  | 11                         |  |
| HM5a_210 | 210    | 2     | 35                  | 9                          |  |
| HM5a_230 | 230    | 2     | 36                  | 11                         |  |

### STP of 4a with 1 (varying monomer amounts):

**Table S4:** Monomer amounts, extractable contents, silica content (TGA) and images of the corresponding hybrid materials.

| Ratio 1 – 4a |   | Name    | Extractable content [wt%] | Silica [wt%] (TGA, extracted material) | Silica [wt%] (calculated) |                                                                                       |
|--------------|---|---------|---------------------------|----------------------------------------|---------------------------|---------------------------------------------------------------------------------------|
| 95           | 5 | HM5a_05 | 21                        | 21                                     | 18                        |  |

|    |     |          |    |    |    |                                                                                     |
|----|-----|----------|----|----|----|-------------------------------------------------------------------------------------|
| 85 | 15  | HM5a_15  | 33 | 19 | 13 |  |
| 50 | 50  | HM5a_50  | 47 | 11 | 8  |  |
| 15 | 85  | HM5a_85  | 25 | 6  | 7  |  |
| 0  | 100 | HM5a_100 | 14 | 6  | 6  |  |

**Table S5:** Polymerization of mixtures consisting of equimolar amounts **1** and **4b** at different temperatures for a time of 2 h.

| Name     | T [°C] | extr. content [wt%] | silica content [wt%] (TGA) |                                                                                       |
|----------|--------|---------------------|----------------------------|---------------------------------------------------------------------------------------|
| HM5b_170 | 170    | 84                  | —                          |   |
| HM5b_190 | 190    | 49                  | 11                         |  |
| HM5b_210 | 210    | 33                  | 12                         |  |
| HM5b_230 | 230    | 45                  | 9                          |  |



**Table S6:** Extractable content for the samples with different monomer amounts of **1** and **4b** prepared at 190 °C for 2 h. The calculated silica content is 8.1 wt%. **4b** didn't show a notable polymerization behavior at those conditions (sample **HM5b\_100**). Therefore, **4b** was polymerized at 200 °C for 2 h (Sample **HM5b\_100\_200**).

| Ratio<br>1 : 4b |     | Name         | Extractable<br>content [wt%] | Silica (TGA,<br>extracted<br>material)<br>[wt%] | Silica<br>(calculated)<br>[wt%] |                                                                                       |
|-----------------|-----|--------------|------------------------------|-------------------------------------------------|---------------------------------|---------------------------------------------------------------------------------------|
| 85              | 15  | HM5b_15      | 31                           | 18                                              | 13                              |    |
| 50              | 50  | HM5b_50      | 49                           | 11                                              | 8                               |    |
| 15              | 85  | HM5b_85      | 41                           | 6                                               | 7                               |    |
| 0               | 100 | HM5b_100     | 85                           | 4                                               | 6                               |   |
| 0               | 100 | HM5b_100_200 | 52                           | 5                                               | 6                               |  |

Polymerization of **4c**:

The procedure for the polymerization were kept consistent to the attempts described above. **4c** was polymerized alone at 170 °C for 2 h.

Solid-state-NMR investigations of the obtained, extracted hybrid materials:

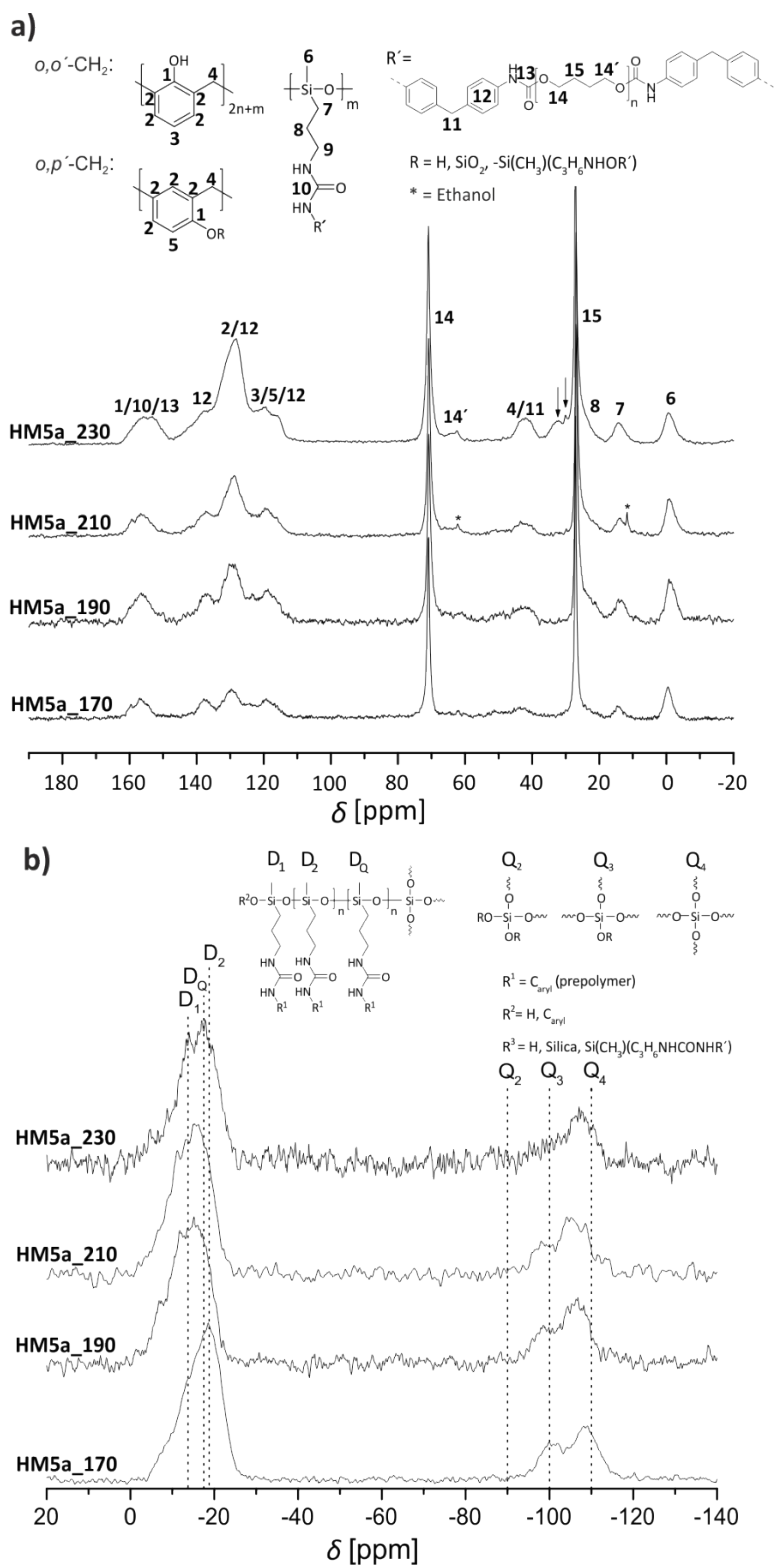

**Figure S6:** Solid-state-NMR spectra of the samples prepared with equimolar monomer amounts (prepolymer **4a** with **1**) at varied reaction conditions: (a) <sup>13</sup>C-<sup>1</sup>H-CP-MAS (Number of scans: **HM5a\_170** 14077; **HM5a\_190** 3799; **HM5a\_210** 15568; **HM5a\_230** 25700). (b) <sup>29</sup>Si-<sup>1</sup>H-CP-MAS-NMR (Number of scans: **HM5a\_170** 62126; **HM5a\_190** 10054; **HM5a\_210** 11505; **HM5a\_230** 9174).

## Investigation of the extracts:

SEC:

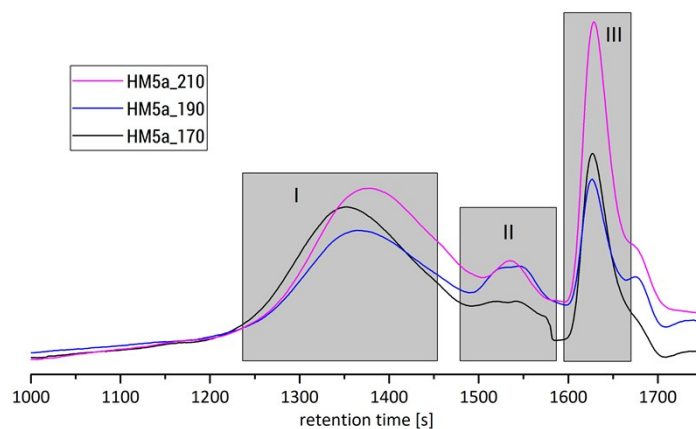

**Figure S7:** SEC-traces of the THF-soluble part of the extracts obtained by extraction with dichloromethane for 48 h of the samples HM5a\_170–190.

**Table S7:** SEC-values of the THF-soluble parts of the extracts obtained by extraction with dichloromethane for 48 h.

| Sample   | Signal | $M_n$ | PDI  |
|----------|--------|-------|------|
| HM5a_170 | I      | 9500  | 1.7  |
|          | II     | 810   | 1.09 |
|          | III    | 218   | 1.06 |
| HM5a_190 | I      | 8400  | 1.6  |
|          | II     | 900   | 1.06 |
|          | III    | 230   | 1.03 |
| HM5a_210 | I      | 7300  | 1.6  |
|          | II     | 880   | 1.04 |
|          | III    | 210   | 1.09 |

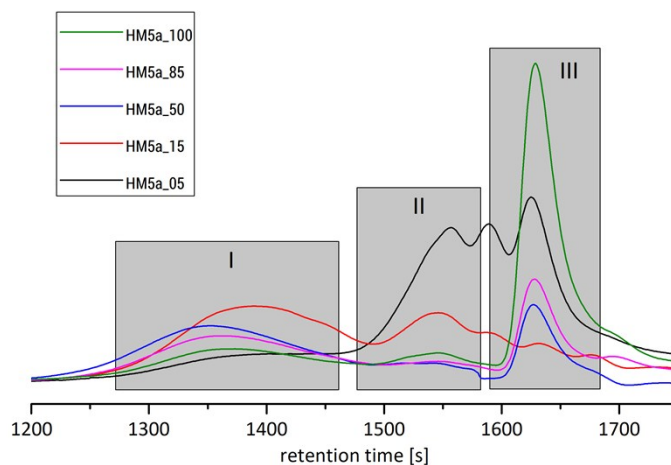

**Figure S8:** SEC-traces of the extractable parts of the samples prepared with different monomer ratios.

**Table S8:** Determined SEC-values.

| Sample   | Signal | $M_n$ | PDI  |
|----------|--------|-------|------|
| HM5a_100 | I      | 9300  | 1.32 |

|         |     |      |      |
|---------|-----|------|------|
|         | II  | 830  | 1.08 |
|         | III | 198  | 1.11 |
|         | I   | 8400 | 1.63 |
| HM5a_85 | II  | 790  | 1.06 |
|         | III | 220  | 1.06 |
|         | I   | 9500 | 1.7  |
| HM5a_50 | II  | 810  | 1.09 |
|         | III | 218  | 1.08 |
|         | I   | 6900 | 1.47 |
| HM5a_15 | II  | 860  | 1.05 |
|         | III | 237  | 1.0  |
|         | I   | 8800 | 1.30 |
| HM5a_05 | II  | 420  | 1.01 |
|         | III | 245  | 1.03 |

<sup>1</sup>H-NMR:

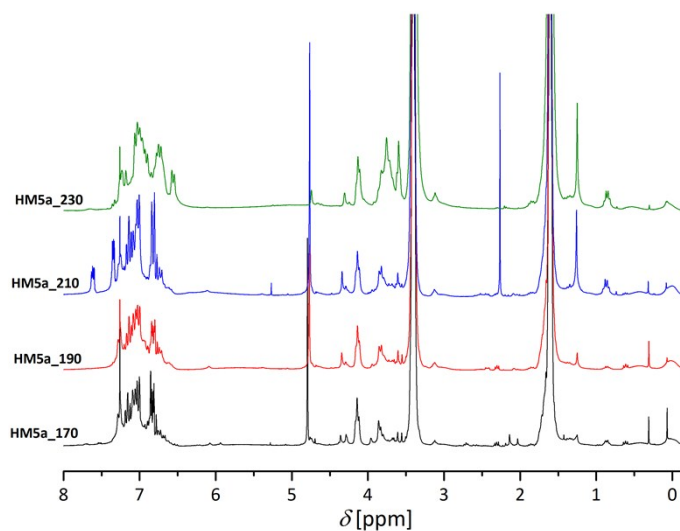

**Figure S9:** <sup>1</sup>H-NMR spectra of the extracts of the samples prepared at different conditions. Characteristic signals due to the polyether polyol-component (around 1.6 ppm and 3.4 ppm) and salicylic alcohol (CH<sub>2</sub>-group at 4.8 ppm) identifiable. The extract of the sample prepared at 230 °C showed no signal due to salicylic alcohol at 4.8 ppm.

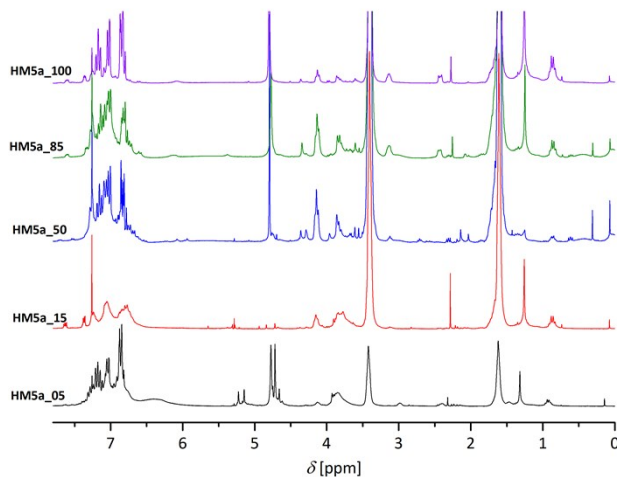

**Figure S10:**  $^1\text{H-NMR}$  spectra of the extracts of the samples prepared at different monomer amounts. Characteristic signals due to the polyether polyol-component (around 1.6 ppm and 3.4 ppm) and salicylic alcohol ( $\text{CH}_2$ -group at 4.8 ppm) are identifiable.

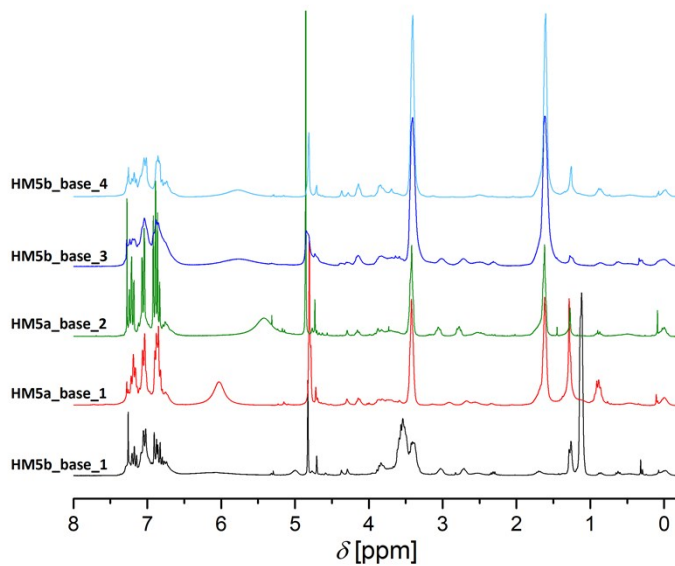

**Figure S11:**  $^1\text{H-NMR}$  spectra of the extracts of the materials prepared by base catalyzed STP.

DSC-measurements:

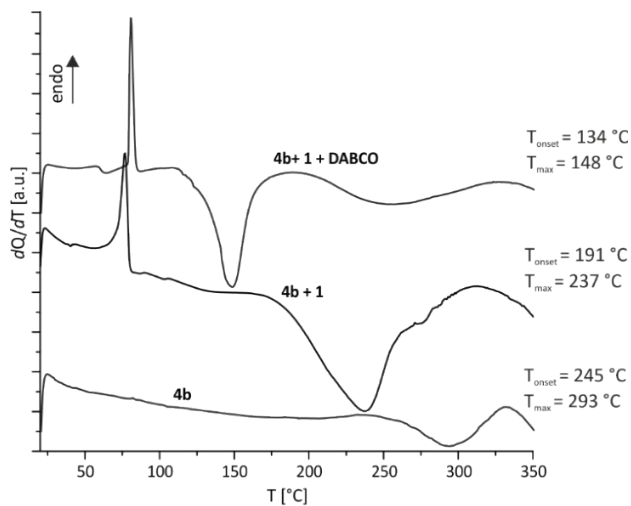

**Figure S12:** DSC-curves of **4b**, the equimolar mixture of **4b** and **1** and the equimolar mixture with 1.0 wt% DABCO. The onset of the exothermic heat flow indicates the beginning of the polymerization.

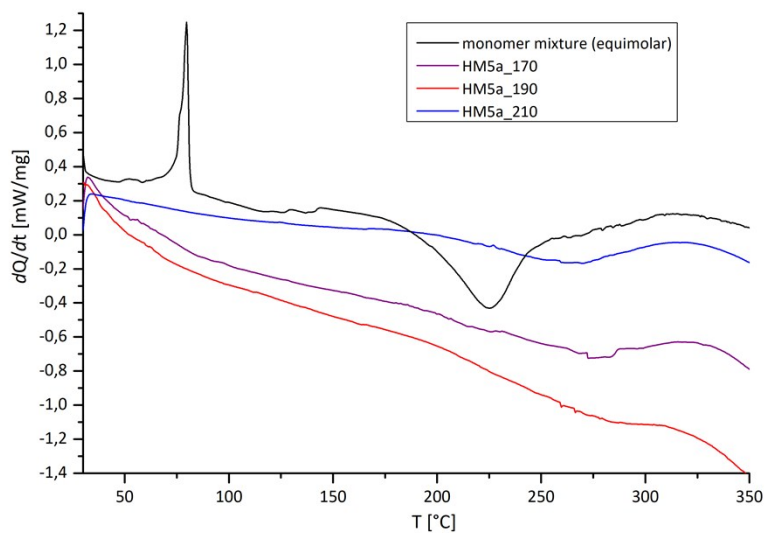

**Figure S13:** DSC-curves of the unextracted samples with equimolar monomer amounts (**4a** and **1**) prepared at different conditions in comparison with the unpolymerized mixture.

TGA-measurements:

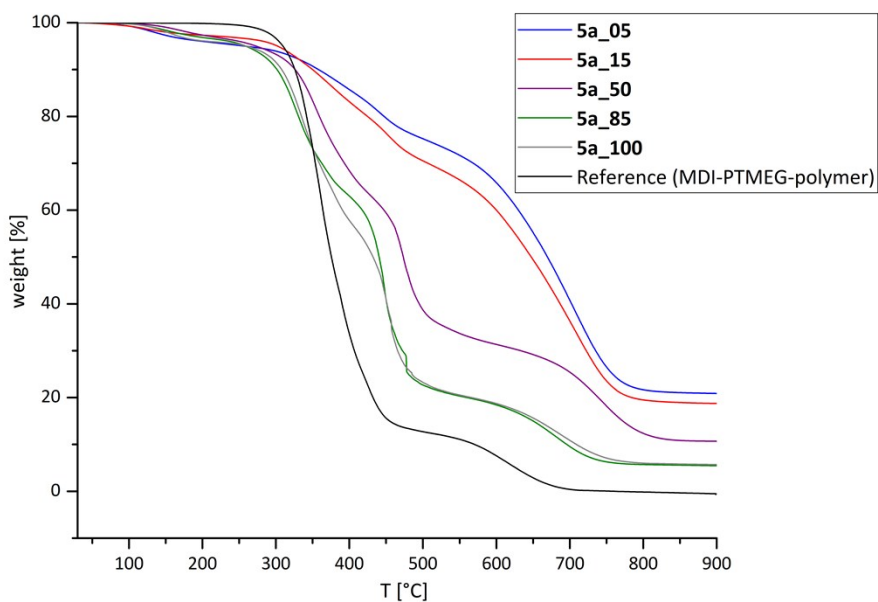

**Figure S14:** TGA-traces of the samples with different monomer amounts polymerized at 170 °C for 2 h.

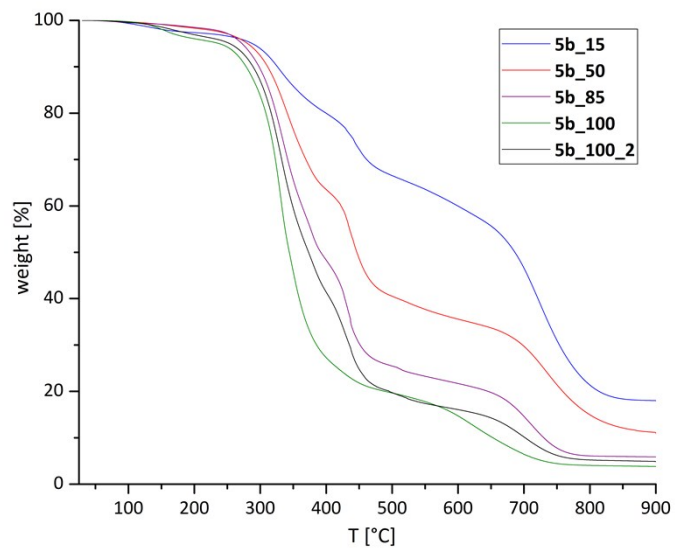

**Figure 15:** TGA-traces of the samples with different monomer amounts (**4b** and **1**) polymerized at 190 °C for 2 h (except **5b\_100\_2** at 200 °C for 2 h).

SEM/EDX-measurement:

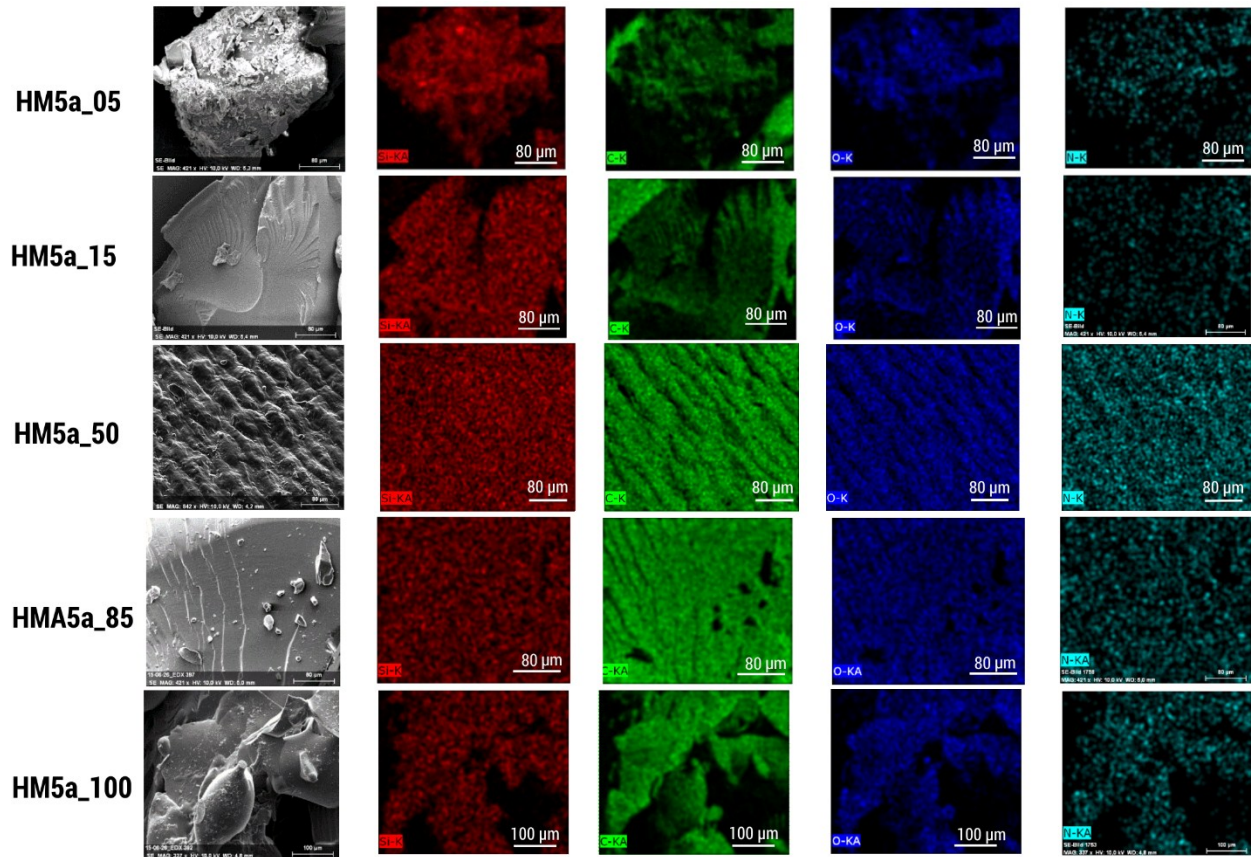

**Figure S16:** SEM- and EDX-images of the samples prepared with different monomer amounts. Explanation of the EDX-coloration: Si-red; Carbon-green; Oxygen-blue; Nitrogen-cyan.

Elemental analysis:

**Table 9:** Elemental analysis of the extracted hybrid materials prepared from **4a** and **1**.

| Sample   | C [%] | H [%] | N [%] | C/N   |
|----------|-------|-------|-------|-------|
| HM5a_05  | 58.14 | 5.63  | 1.40  | 41.52 |
| HM5a_15  | 59.56 | 6.30  | 2.63  | 22.69 |
| HM5a_50  | 61.78 | 8.00  | 4.45  | 13.88 |
| HM5a_85  | 64.03 | 8.59  | 4.56  | 14.04 |
| HM5a_100 | 64.10 | 8.60  | 4.20  | 15.24 |

**Table 10:** Elemental analysis of the extracted hybrid materials prepared from **4b** and **1**.

| Sample     | C [%] | H [%] | N [%] | C/N   |
|------------|-------|-------|-------|-------|
| HM5b_15    | 57.62 | 6.30  | 3.13  | 18.41 |
| HM5b_50    | 61.42 | 7.16  | 4.64  | 13.24 |
| HM5b_85    | 62.36 | 7.75  | 5.19  | 12.00 |
| HM5b_100   | 63.47 | 7.64  | 6.11  | 10.38 |
| HM5b_100_2 | 62.10 | 7.97  | 5.17  | 12.01 |



TG-MS-measurement of an equimolar mixture of 4a and 1:

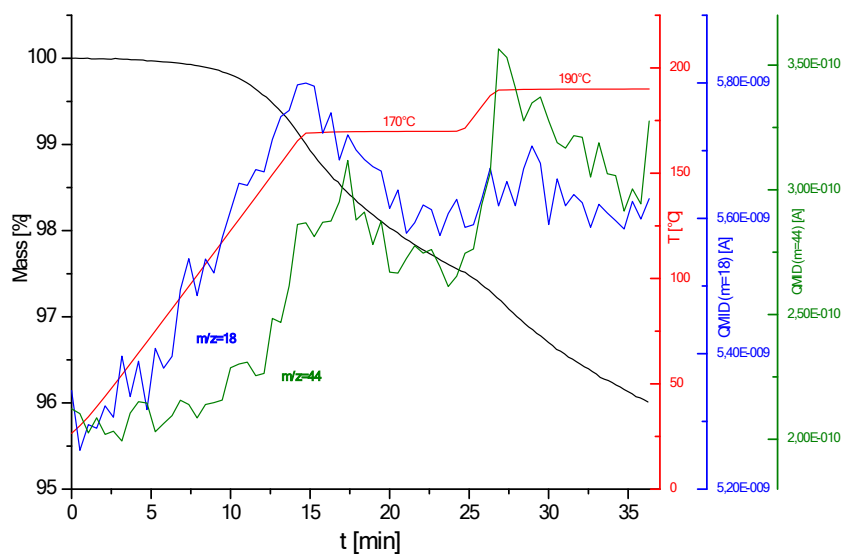

**Figure S17:** TG-MS measurement of the equimolar reaction mixture shows the release of water ( $m/z=18$ ; blue line) with subsequent carbon dioxide release ( $m/z=44$ , green line). This result explains the slight foaming of the reaction mixture at the polymerization process.

IR-measurement of different HMs (5a) and their corresponding educts

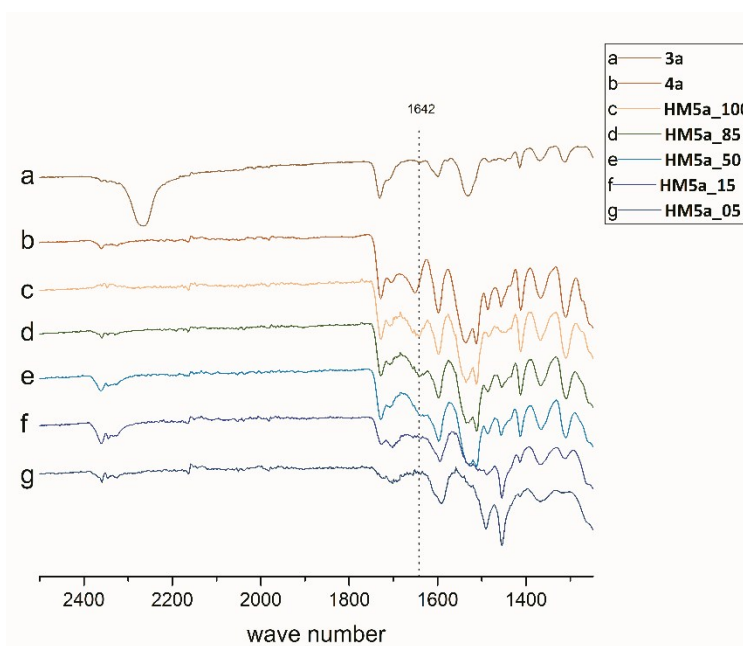

**Figure S18:** IR-spectra of the HMs derived from 4a with different monomer amounts as well as their corresponding educts 3a and 4a.
